# Supplementary material for: The Evolving Scenario of COVID-19 in Hemodialysis Patients
Source: MDPI journal article supplement (doi:10.3390/ijerph191710836), 2022-08-31
Supplement: s1 [file s1]

# The Evolving Scenario of COVID-19 in Hemodialysis Patients

## Supplementary Materials

**Table S1.** Demographics and medical history at admission of hemodialysis patients affected by COVID-19 according to the response to the second dose of COVID-19 mRNA vaccine.

|                                     | Responders | Non-responders | <i>p</i> |
|-------------------------------------|------------|----------------|----------|
| n, *                                | 39         | 10             |          |
| Age, yr                             | 67.7±18    | 68.4±17        | 0.9      |
| Men, n (%)                          | 30 (76)    | 8 (80)         | 1        |
| BMI, kg/m <sup>2</sup>              | 26±5.2     | 22.2±4.5       | 0.02     |
| Length of time on dialysis, months  | 39±30.5    | 45±22          | 0.27     |
| Comorbidities                       |            |                |          |
| Hypertension, n (%)                 | 35 (89)    | 7 (70)         | 0.1      |
| Diabetes mellitus, n (%)            | 17 (43)    | 4 (40)         | 1        |
| Cardiovascular disease, n (%)       | 12 (30)    | 6 (60)         | 0.1      |
| Autoimmune disorders, n (%)         | 2 (5)      | 3 (30)         | 0.05     |
| Prior transplant, n (%)             | 4 (10)     | 1 (10)         | 1        |
| History of COVID-19, n (%)          | 4 (10)     | 0              | 0.5      |
| Vaccinated with booster dose, n (%) | 33 (84)    | 8 (80)         | 0.6      |

Data are expressed as means ± standard deviations (SD) and were analyzed by Student T-test. Proportions for categorical variables were compared using Fisher's exact test. A P-value <0.05 was considered statistically significant. Abbreviations: Coronavirus disease-19, COVID-19; body mass index, BMI.

\*data on anti-S-RBD IgG levels were available for 49 patients

**Table S2.** Basal laboratory parameters of hemodialysis patients affected by COVID-19 according to the response to the second dose of COVID-19 mRNA vaccine.

|                                       | Responders | Non-responders | <i>p</i> |
|---------------------------------------|------------|----------------|----------|
| WBC Count, ×10 <sup>9</sup> /L        | 5.6 ± 1.7  | 5.7 ± 2.1      | 0.8      |
| Neutrophil count, ×10 <sup>9</sup> /L | 4 ± 1.5    | 3.6 ± 1.5      | 0.4      |
| Neutrophil %                          | 73 ± 10    | 65 ± 10.8      | 0.037    |
| Lymphocyte count, ×10 <sup>9</sup> /L | 0.97 ± 0.3 | 0.88 ± 0.6     | 0.18     |
| Lymphocyte %                          | 15.1 ± 9   | 18.6 ± 7.8     | 0.12     |
| Neutrophil/lymphocyte ratio           | 4.3 (2.6)  | 5.9 (6.5)      | 0.15     |
| Albumin, g/L                          | 37 ± 4     | 33 ± 6         | 0.15     |
| LDH, U/L                              | 234 ± 206  | 192 ± 32       | 0.4      |
| Procalcitonin, µg/L                   | 1.5 (1.8)  | 1 (0.7)        | 0.4      |
| hs-CRP, mg/L                          | 13 (27.5)  | 15.8 (14.5)    | 0.9      |
| Interleukin-6, pg/mL                  | 14.8 ± 10  | 16.3 ± 17.8    | 0.7      |
| Ferritin, µg/L                        | 228 (903)  | 216 (407)      | 0.08     |

Normally distributed data are expressed as means ± standard deviations (SD) and were analyzed by Student T-test. Non-normally distributed data are expressed as medians and interquartile ranges (IQR) and were compared by Mann-Whitney test. A P-value <0.05 was considered statistically significant.

Abbreviations: Coronavirus disease-19, COVID-19; white blood cells, WBC; lactate dehydrogenase, LDH; high-sensitivity C-reactive protein, hs-CRP.

Group 1, from March to December 2020; Group 2, from September 2021 to February 2022

**Table S3.** Time course of laboratory parameters in hemodialysis patients affected by COVID-19 during different periods.

|                                       | Group 1     |             |            | <i>p</i> | Group 2     |           |            | <i>p</i> |
|---------------------------------------|-------------|-------------|------------|----------|-------------|-----------|------------|----------|
|                                       | Day 0       | Day 7       | Day 14     |          | Day 0       | Day 7     | Day 14     |          |
| WBC Count, ×10 <sup>9</sup> /L        | 5.5 ± 3.2   | 5.6 ± 2.1   | 5.7 ± 2.4  | 0.2      | 5.5 ± 1.8   | 6.6 ± 1.7 | 6.4 ± 2    | <0.001   |
| Neutrophil count, ×10 <sup>9</sup> /L | 4.3 ± 3.2   | 4.4 ± 2     | 4.1 ± 2    | 0.14     | 3.6 ± 1.4   | 4.4 ± 1.4 | 4.4 ± 1.6  | 0.004    |
| Lymphocyte count, ×10 <sup>9</sup> /L | 0.69 ± 0.35 | 0.74 ± 0.36 | 0.77 ± 0.3 | 0.6      | 0.97 ± 0.45 | 1.2 ± 0.5 | 1.2 ± 0.48 | <0.001   |
| Neutrophil/lymphocyte ratio           | 5.8 (5.4)   | 4.9 (3.2)   | 4.6 (4.1)  | 0.9      | 4.2 (3.5)   | 4 (3.3)   | 4 (3.2)    | 0.7      |
| LDH, U/L                              | 254 ± 98    | 221 ± 59    | 236 ± 95   | 0.5      | 220 ± 173   | 200 ± 86  | 198 ± 30   | 0.7      |
| hs-CRP, mg/L                          | 28.8 (45.6) | 12.7 (18.7) | 16.3(26.8) | 0.08     | 14.4 (16.5) | 7.4 (20)  | 5 (14)     | 0.002    |

Normally distributed data are expressed as means ± standard deviations (SD) and non-normally distributed data are expressed as medians and interquartile ranges (IQR). Comparisons were made using mixed models for repeated measures, followed by Tukey's multiple comparison tests. A P-value <0.05 was considered statistically significant. Abbreviations: Coronavirus disease-19, COVID-19; white blood cells, WBC; lactate dehydrogenase, LDH; high-sensitivity C-reactive protein, hs-CRP.

Group 1, from March to December 2020; Group 2, from September 2021 to February 2022

**Table S4.** Clinical outcomes of hemodialysis patients affected by COVID-19 according to the response to the second dose of COVID-19 mRNA vaccine.

|                                | Responders | Non-Responders | <i>p</i> |
|--------------------------------|------------|----------------|----------|
| n,                             | 39         | 10             |          |
| Illness duration, days *       | 17.6 ± 6.4 | 23.9±7.9       | 0.02     |
| Hospitalized patients, n (%) + | 2 (5)      | 4 (40)         | 0.018    |
| Deaths, n (%)                  | 2 (5)      | 1 (10)         | 0.5      |

Data are expressed as means ± standard deviations (SD) and were analyzed by Student T-test. Proportions for categorical variables were compared using Fisher's exact test. A P-value <0.05 was considered statistically significant.

\* Illness duration was calculated only in survivors from the date of the first positive RT-PCR assay for SARS-COV-2 infection to the date of the two consecutive negative RT-PCR assays.

+ 1 additional hospitalization occurred in an unvaccinated patient
